# Supplementary material
Source: ML conference proceedings conference paper supplement (https://openreview.net/forum?id=kc66PwD7St)
Supplement: supplementary_material [file attachment]

---

# Conditional Generative Modeling for High-dimensional Marked Temporal Point Processes

---

Anonymous Author(s)

Affiliation

Address

email

## Abstract

1       Recent advancements in generative modeling have made it possible to generate  
2       high-quality content from context information, but a key question remains: how to  
3       teach models to know when to generate content? To answer this question, this study  
4       proposes a novel event generative model that draws its statistical intuition from  
5       marked temporal point processes, and offers a clean, flexible, and computationally  
6       efficient solution for a wide range of applications involving the generation of asyn-  
7       chronous events with high-dimensional marks. We use a conditional generator that  
8       takes the history of events as input and generates the high-quality subsequent event  
9       that is likely to occur given the prior observations. The proposed framework offers  
10       a host of benefits, including considerable representational power to capture intricate  
11       dynamics in multi- or even high-dimensional event space, as well as exceptional  
12       efficiency in learning the model and generating samples. Our numerical results  
13       demonstrate superior performance compared to other state-of-the-art baselines.

## 14   1 Introduction

15   Generating future events is a challenging yet fascinating task, with numerous practical applications  
16   [2, 9, 16, 31]. For instance, a news agency may need to generate news articles in a timely manner, taking  
17   into account the latest events and trends. Similarly, an online shopping platform may aim to provide highly  
18   personalized recommendations for products, services, or content based on a user’s preferences and behavior  
19   patterns over time, as shown in Figure 1. These types of applications are ubiquitous in daily life, and  
20   the related data typically consist of a sequence of events that denote when and where each event occurred,  
21   along with additional descriptive information such as category, volume, and even text or image, commonly  
22   referred to as “marks”. Recent improvements in generative modeling have made it possible to generate  
23   high-quality content from contextual information such as language descriptions. However, it remains an open  
24   question: how to teach these models to determine the appropriate timing for generating such content based  
25   on the history of events.  
26  
27  
28  
29  
30  
31  
32  
33  
34  
35

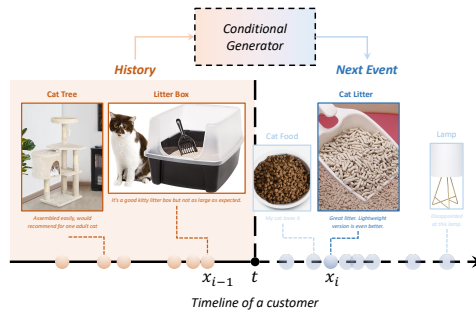

Figure 1: An example of generating high-dimensional content over time. In this example, the conditional generator explores the customer’s next possible activity, including not only the purchase time, but also the item, and even its image or review. The observed events from the customer’s past purchases are represented by yellow dots, while the next generated event is indicated by a blue dot.

36   Point processes have been a popular tool for modeling and generating asynchronous and discrete event  
37   data. With the rise of complex systems, advanced neural point processes [6, 18, 25] are proposed as  
38   powerful methods to model and simulate data by capturing complex dependencies among observed  
39   events. However, due to the use of neural networks, the model likelihood is often analytically  
40   intractable, requiring complex and expensive approximations during learning. More seriously, these

41 models face significant limitations in *generating events with high-dimensional marked information*,  
 42 as the event simulation relies heavily on the thinning algorithm [20], which can be costly or even  
 43 impossible when the mark space is high-dimensional. This significantly restricts the applicability of  
 44 these models to modern applications [30, 34], where event data often come with high-dimensional  
 45 marks, such as texts and images in police crime reports or social media posts.

46 To tackle these challenges, this paper introduces a novel combination of generative framework and  
 47 marked temporal point processes for efficient modeling and generation of high-quality asynchronous  
 48 events with high-dimensional marks. The effectiveness of our model is rooted in the ability to  
 49 approximate the underlying high-dimensional data distribution through generated samples by a  
 50 conditional generator, which takes the history of events as its input. The event history is summarized  
 51 by a recurrent neural architecture, allowing for flexible selection based on the application’s needs.  
 52 The benefits of our model can be summarized by:

- 53 1. Our model is capable of handling time-stamped high-dimensional marks such as images or texts,  
 54 leveraging the power of generative models within the framework of marked point processes;
- 55 2. Our model possesses superior representative power, as it does not confine the conditional intensity  
 56 or probability density of the events to any specific parametric form;
- 57 3. Our model outperforms existing state-of-the-art baselines in terms of estimation accuracy and  
 58 generating high-quality event series;
- 59 4. Our model excels in computational efficiency during both the training phase and the event  
 60 generation process. In particular, our method needs only  $\mathcal{O}(N_T)$  for generating  $N_T$  events, in  
 61 contrast to the thinning algorithm’s complexity of  $\mathcal{O}(N^d \cdot N_T)$ , where  $N \gg N_T$  and  $d$  represents  
 62 the event dimension.

63 It is important to note that our proposed framework is general and model-agnostic, meaning that a  
 64 wide spectrum of generative models and learning algorithms can be applied within our framework.  
 65 We present two possible learning algorithms in the Appendix A.

## 66 2 Methodology

### 67 2.1 Background: Marked temporal point processes

68 Marked temporal point processes (MTPPs) [23] consist of a sequence of *discrete events* over time.  
 69 Each event is associated with a (possibly multi-dimensional) *mark* that contains detailed information  
 70 of the event. Let  $T > 0$  be a fixed time-horizon, and  $\mathcal{M} \subseteq \mathbb{R}^d$  be the space of marks. We denote the  
 71 space of observation as  $\mathcal{X} = [0, T) \times \mathcal{M}$  and a data point in the discrete event sequence as

$$x = (t, m), \quad t \in [0, T), \quad m \in \mathcal{M},$$

72 where  $t$  is the event time and  $m$  represents the mark. Let  $N_t$  be the number of events up to time  $t < T$   
 73 (which is random), and  $\mathcal{H}_t := \{x_1, x_2, \dots, x_{N_t}\}$  denote historical events. Let  $\mathbb{N}$  be the counting  
 74 measure on  $\mathcal{X}$ , *i.e.*, for any measurable  $S \subseteq \mathcal{X}$ ,  $\mathbb{N}(S) = |\mathcal{H}_t \cap S|$ . For any function  $\phi : \mathcal{X} \rightarrow \mathbb{R}$ , the  
 75 integral with respect to the counting measure is defined as  $\int_S \phi(x) d\mathbb{N}(x) = \sum_{x_i \in \mathcal{H}_t \cap S} \phi(x_i)$ . The  
 76 events’ distribution in MTPPs can be characterized via the conditional intensity function  $\lambda$ , which is  
 77 defined to be the occurrence rate of events in the marked temporal space  $\mathcal{X}$  given the events’ history  
 78  $\mathcal{H}_{t(x)}$ , *i.e.*,

$$\lambda(x|\mathcal{H}_{t(x)}) = \mathbb{E} (d\mathbb{N}(x)|\mathcal{H}_{t(x)}) / dx, \quad (1)$$

79 where  $t(x)$  extracts the occurrence time of the possible event  $x$ . Given the conditional intensity  
 80 function  $\lambda$ , the corresponding conditional probability density function (PDF) can be written as

$$f(x|\mathcal{H}_{t(x)}) = \lambda(x|\mathcal{H}_{t(x)}) \cdot \exp \left( - \int_{[t_n, t(x)) \times \mathcal{M}} \lambda(u|\mathcal{H}_{t(u)}) du \right). \quad (2)$$

81 where  $t_n$  denotes the time of the most recent event before time  $t(x)$ . The point process models can  
 82 be learned using maximum likelihood estimation (MLE). See all the derivations in Appendix B.

### 83 2.2 Conditional event generator

84 The main idea of the proposed framework is to use a *conditional event generator* to produce the  $i$ -th  
 85 event  $x_i = (t_{i-1} + \Delta t_i, m_i)$  given its previous  $i - 1$  events. Here,  $\Delta t_i$  and  $m_i$  indicate the time  
 86 interval between the  $i$ -th event and its preceding event and the mark of the  $i$ -th event, respectively.  
 87 Formally, this is achieved by a generator function:

$$g(z, \mathbf{h}_{i-1}) : \mathbb{R}^{r+p} \rightarrow (0, +\infty) \times \mathcal{M},$$

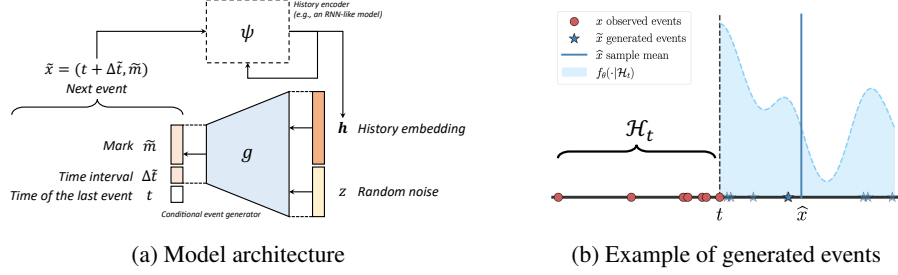

Figure 2: (a) The architecture of the proposed framework, which consists of two key components: A conditional generative model  $g$  that generates  $(\Delta\tilde{t}, \tilde{m})$  given its history embedding and an RNN-like model  $\psi$  that summarizes the events in the history. (b) An example of generated one-dimensional (time only) events  $\{\tilde{x}^{(j)}\}$  given the history  $\mathcal{H}_t$ . The shaded area suggests the underlying conditional probability density captured by the model with parameters  $\theta$ .

88 which takes an input in the form of a random noise vector ( $z \in \mathbb{R}^r \sim \mathcal{N}(0, I)$ ) and a hidden  
 89 embedding ( $\mathbf{h}_{i-1} \in \mathbb{R}^p$ ) that summarizes the history information up to and excluding the  $i$ -th event,  
 90 namely,  $\mathcal{H}_{t_i} = \{x_1, \dots, x_{i-1}\}$ . The output of the generator is the concatenation of the time interval  
 91 and mark of the  $i$ -th event denoted by  $\Delta\tilde{t}_i$  and  $\tilde{m}_i$ , respectively. To ensure that the time interval is  
 92 positive, we restrict  $\Delta\tilde{t}_i$  to be greater than zero.

93 To represent the conditioning variable  $\mathbf{h}_{i-1}$ , we use a *history encoder* represented by  $\psi$ , which has  
 94 a recursive structure such as recurrent neural networks (RNNs) [32] or Transformers [28]. In our  
 95 numerical results, we opt for long short-term memory (LSTM) [7], which takes the current event  $x_i$   
 96 and the preceding hidden embedding  $\mathbf{h}_{i-1}$  as input and generates the new hidden embedding  $\mathbf{h}_i$ . This  
 97 new hidden embedding represents an updated summary of the past events including  $x_i$ . Formally,

$$\mathbf{h}_0 = \mathbf{0} \text{ and } \mathbf{h}_i = \psi(x_i, \mathbf{h}_{i-1}), \quad i = 1, 2, \dots, N_T.$$

98 We denote the parameters of both  $g$  and  $\psi$  using  $\theta \in \Theta$ . Figure 2 (a) presents the model architecture.

99 **Connection to marked temporal point processes** The proposed framework draws its statistical  
 100 inspiration from MTPPs. Unlike other recent attempts at modeling point processes, our framework  
 101 *approximates the conditional probability of events using generated samples* rather than directly  
 102 specifying the conditional intensity in (1) or PDF in (2) using a parametric model [6, 18, 22, 24, 33].

103 As illustrated by Figure 2 (b), when our model generates an event denoted by  $\tilde{x} = (t + \Delta\tilde{t}, \tilde{m})$ , it  
 104 implies that the resulting event  $\tilde{x}$  follows a conditional probabilistic distribution that is determined by  
 105 the model parameter  $\theta$  and the event's history  $\mathcal{H}_t$ :

$$\tilde{x} \sim f_\theta(x|\mathcal{H}_{t(x)}),$$

106 where  $f_\theta$  denotes the conditional PDF of the underlying MTPP (2). This design has three main  
 107 advantages compared to other point process models:

- 108 1. *Generative efficiency*: The generative nature of our model confers an exceptional efficiency in  
 109 simulating a complete event series for any point processes without relying on thinning algorithms  
 110 [20]. To exemplify, thinning algorithm (Algorithm 4) has a time complexity of  $\mathcal{O}(N^d \cdot N_T)$   
 111 to generate  $N_T$  events from a history-dependent point process in  $d$ -dimensional space  $\mathcal{X}$ , with  
 112  $N \gg N_T$  being the number of uniformly sampled candidates in one dimension. In contrast, our  
 113 generation process (Algorithm 1) only requires a complexity of  $\mathcal{O}(N_T)$ .
- 114 2. *Expressiveness*: The proposed model enjoys considerable representational power, as it does not  
 115 impose any restrictions on the parametric form of the conditional intensity  $\lambda$  or PDF  $f$ . The  
 116 numerical findings also indicate that our model is capable of capturing complex event interactions,  
 117 even in a multi-dimensional space.
- 118 3. *Predictive efficiency*: To predict the next event  $\hat{x}_i = (t_{i-1} + \Delta\hat{t}_i, \hat{m}_i)$  given the observed events'  
 119 history  $\mathcal{H}_{t_i}$ , we can calculate the sample average over a set of generated events  $\{\tilde{x}_i^{(l)}\}$  without  
 120 the need for an explicit expectation computation, *i.e.*,

$$\hat{x}_i = \int_{(t_{i-1}, +\infty) \times \mathcal{M}} x \cdot f_\theta(x|\mathcal{H}_{t(x)}) dx \approx \frac{1}{L} \sum_{l=1}^L \tilde{x}_i^{(l)},$$

121 where  $L$  denotes the number of samples.

---

**Algorithm 1** Event generation process using CEG

---

**Input:** Generator  $g$ , history encoder  $\psi$ , time horizon  $T$   
**Initialization:**  $\mathcal{H}_T = \emptyset, \mathbf{h}_0 = \mathbf{0}, t = 0, i = 0$   
**while**  $t < T$  **do**  
  1. Sample  $z \sim \mathcal{N}(0, I)$ ;  
  2. Generate next event  $\tilde{x} = (t + \Delta\tilde{t}, \tilde{m})$ , where  $(\Delta\tilde{t}, \tilde{m}) = g(z, \mathbf{h}_i)$ ;  
  3.  $i = i + 1; t = t + \Delta\tilde{t}; x_i = \tilde{x}; \mathcal{H}_T = \mathcal{H}_T \cup \{x_i\}$ ;  
  4. Update hidden embedding  $\mathbf{h}_i = \psi(x_i, \mathbf{h}_{i-1})$ ;  
**end while**  
**if**  $t(x_i) \geq T$  **then**  
  **return**  $\mathcal{H}_T - \{x_i\}$   
**else**  
  **return**  $\mathcal{H}_T$   
**end if**

---

### 122 3 Experiments

123 We evaluate our method using both synthetic and real data and demonstrate the superior performance  
124 compared to five state-of-the-art approaches, including (1) Recurrent marked temporal point processes  
125 (RMTTP) [6], (2) Neural Hawkes (NH) [18], (3) Fully neural network based model (FullyNN) [22], (4)  
126 Epidemic type aftershock sequence (ETAS) [21] model, (5) Deep non-stationary kernel in point process  
127 (DNSK) [5]. The first three baselines leverage neural networks to model temporal event data (or only  
128 with categorical marks). The last two baselines are chosen for testing multi-dimensional event data.  
129 Meanwhile, the DNSK is the state-of-the-art method that uses neural networks for high-dimensional  
130 mark modeling. In the following, we refer to our proposed method as the conditional event generator  
131 (CEG). Detailed experimental setup and model architectures are presented in Appendix F.

#### 132 3.1 Synthetic data

133 We first evaluate our model on synthetic data. To be specific, we generate four one-dimensional  
134 (1D) and a three-dimensional (3D) synthetic data sets: Four 1D (time only) data sets include 1,000  
135 sequences each, with an average length of 135 events per sequence, and are simulated by two  
136 self-exciting processes and two self-correcting processes, respectively, using thinning algorithm  
137 (Algorithm 4 in Appendix F). The 3D (time and space) data set also includes 1,000 sequences, each  
138 with an average length of 150, generated by a randomly initialized CEG using Algorithm 1.

139 To assess the effectiveness of our model in acquiring the underlying data distribution, we computed  
140 the mean relative error (MRE) of the estimated conditional intensity and PDF on the testing set, and  
141 compared them to the ground truth. Table 1 presents more quantitative results on 1D and 3D data  
142 sets, including log-likelihood testing per events and the mean relative error (MRE) of the recovered  
143 conditional density and intensity. These results demonstrate the consistent superiority of CEG over  
144 other methods across all scenarios. Figure F3 and Figure F4 in Appendix F presents visualizations of  
145 the estimated conditional probability density on 1D and 3D synthetic data sets, where CEG accurately  
146 captures the complex spatio-temporal point patterns while other baselines fail to do so.

#### 147 3.2 Semi-synthetic data with image marks

148 We test our model’s capability of generating complex high-dimensional marked events on two semi-  
149 synthetic data, including time-stamped MNIST (T-MNIST) and CIFAR-100 (T-CIFAR). In these  
150 data sets, both the mark (the image category) and the timestamp are generated through a marked  
151 point process. Images from MNIST and CIFAR-100 are subsequently chosen at random based  
152 on these marks, acting as an high-dimensional representation of the original image category. It’s  
153 important to note that during the training phase, categorical marks are excluded, retaining only the  
154 high-dimensional images for model learning. Since calculating the log-likelihood for event series with

Table 1: Performance comparison with five baseline methods.

| Model   | 1D self-exciting data |              |                  | 1D self-correcting data |              |                  | 3D synthetic data     |              |                  | 3D earthquake data    |
|---------|-----------------------|--------------|------------------|-------------------------|--------------|------------------|-----------------------|--------------|------------------|-----------------------|
|         | Testing $\ell$        | MRE of $f$   | MRE of $\lambda$ | Testing $\ell$          | MRE of $f$   | MRE of $\lambda$ | Testing $\ell$        | MRE of $f$   | MRE of $\lambda$ | Testing $\ell$        |
| RMTTP   | -1.051 (0.015)        | 0.437        | 0.447            | -0.975 (0.006)          | 0.308        | 0.391            | /                     | /            | /                | /                     |
| NH      | -0.776 (0.035)        | 0.175        | 0.198            | -1.004 (0.010)          | 0.260        | 0.363            | /                     | /            | /                | /                     |
| FullyNN | -1.025 (0.003)        | 0.233        | 0.330            | -0.821 (0.008)          | 0.322        | 0.495            | /                     | /            | /                | /                     |
| ETAS    | /                     | /            | /                | /                       | /            | /                | -4.832 (0.002)        | 0.981        | 0.902            | -3.939 (0.002)        |
| DNSK    | -0.649 (0.002)        | 0.015        | <b>0.024</b>     | -2.832 (0.004)          | 0.134        | 0.185            | -2.560 (0.004)        | 0.339        | 0.415            | -3.606 (0.003)        |
| CEG     | <b>-0.645</b> (0.002) | <b>0.013</b> | 0.066            | <b>-0.768</b> (0.005)   | <b>0.042</b> | <b>0.075</b>     | <b>-2.540</b> (0.011) | <b>0.049</b> | <b>0.089</b>     | <b>-2.629</b> (0.015) |

\*Numbers in parentheses present standard error for three independent runs.



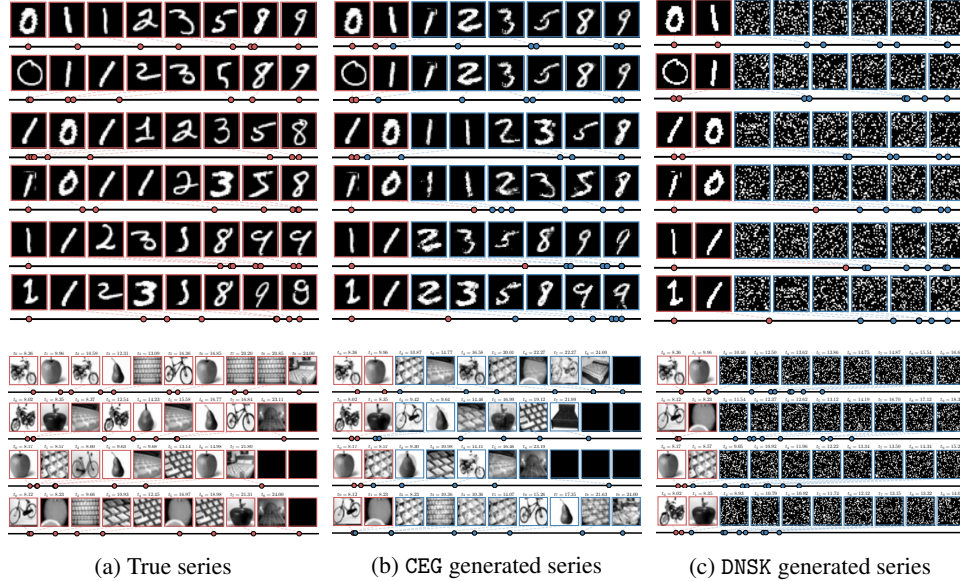

Figure 3: Generated T-MNIST (first row) and T-CIFAR (second row) series using CEG and a neural point process baseline DNSK, with true sequences displayed in the first column. Each event series is generated (blue boxes) given the first two true events (red boxes).

high-dimensional marks is infeasible for CEG (the number of samples needed to estimate density is impractically large), we evaluate the model performance according to: (1) the quality of the generated image marks and (2) the transition dynamics of the entire series. Details of the data generation processes can be found in Appendix F.

1. T-MNIST: For each sequence in the data, the actual digit in the succeeding image is the aggregate of the digits in the two preceding marks. The initial two digits are randomly selected from 0 and 1. The digits in the marks must be less than nine. The hand-written image for each mark is then chosen from the corresponding subset of MNIST according to the digit. The time for the entire MNIST series conforms to a Hawkes process with an exponentially decaying kernel.
2. T-CIFAR: The data contains event series that depict a typical day in the life of a graduate student, spanning from 8:00 to 24:00. The marks are sampled from four categories: outdoor exercises, food ingestion, working, and sleeping. Depending on the most recent activity, the subsequent one is determined by a transition probability matrix. Images are selected from the respective categories to symbolize each activity. The activity times follows a self-correcting process.

Figure 3 presents the true T-MNIST series alongside the series generated by CEG and DNSK given the first two events. Our model not only generates high-dimensional event marks that resemble true images, but also successfully captures the underlying data dynamics, such as the clustering patterns of the self-exciting process and the transition pattern of image marks. On the contrary, the DNSK only learns the temporal effects of historical events and struggles to estimate the conditional intensity for the high-dimensional marks. Besides, the grainy images generated by DNSK demonstrate the challenge of simulating credible high-dimensional content using thinning algorithm. This is because the real data points, being sparsely scattered in the high-dimensional mark space, make it challenging for the candidate points to align closely with them in the thinning algorithm.

Similar results are shown in Figure 3 on T-CIFAR data set, where the CEG is able to simulate high-quality daily activities with high-dimensional content at appropriate times. However, the DNSK fails to extract any meaningful patterns from the data, since intensity-based modeling and data generation become ineffectual in high-dimensional mark space.

### 3.3 Real data

In our real data results, our model demonstrates superior efficacy in generating multi- and high-dimensional event sequences of high quality, which closely resemble real event series.

**Northern California earthquake catalog** We test our method using the Northern California Earthquake Data [19], which contains detailed information on the timing and location of earthquakes that occurred in central and northern California from 1978 to 2018, totaling 5,984 records with

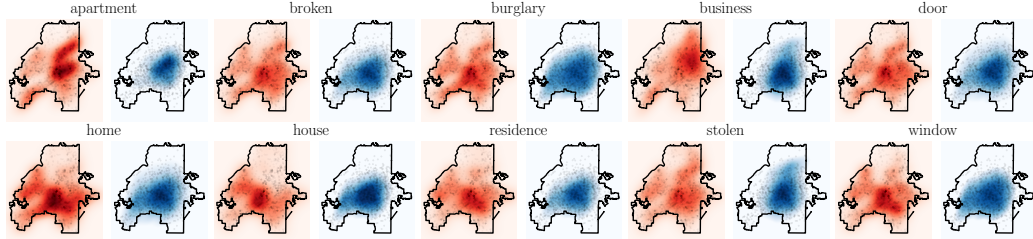

Figure 5: The spatial distributions of the TF-IDF values of 10 crime-related keywords. The heatmap in red and blue represent distributions of TF-IDF value of the keywords in the true and generated events, respectively. The black dots pinpoint the locations of the corresponding events.

188 magnitude greater than 3.5. We divided the data into several sequences by month. In comparison  
 189 to other baseline methods that can only handle 1D event data, we primarily evaluated our model  
 190 against DNSK and ETAS. we assess the quality of the generated sequences by each model. Our model’s  
 191 generation process for new sequences can be efficiently carried out using Algorithm 1, whereas  
 192 both DNSK and ETAS requires the use of a thinning algorithm (Algorithm 4) for simulation. We also  
 193 compared the estimated conditional probability density functions (PDFs) of real sequences by each  
 194 model in Appendix F.

195 We compare the generative ability  
 196 of each method in Figure 4. The  
 197 top left sub-figure features a single  
 198 event series selected at random  
 199 from the data set, while the rest of  
 200 the sub-figures in the first row exhibit  
 201 event series generated by each  
 202 model, respectively. The quality of  
 203 the generated earthquake sequence  
 204 using our method is markedly superior  
 205 to that generated by DNSK and  
 206 ETAS. We also simulate multiple  
 207 sequences using each method and  
 208 visualize the spatial distribution of  
 209 generated earthquakes in the second  
 210 row. The shaded area reflects the  
 211 spatial density of earthquakes obtained  
 212 by KDE and represents the “background  
 213 rate” over space. It is evident that  
 214 CEG is successful in capturing the  
 215 underlying earthquake distribution,  
 216 while the two STPP baselines are  
 217 unable to do so. Additional  
 218 results in Figure F6 visualizes the  
 219 conditional PDF estimated by CEG,  
 220 DNSK, and ETAS for an actual  
 221 earthquake sequence in testing set,  
 222 respectively. The results indicate  
 223 that our model is able to capture  
 224 the heterogeneous triggering effects  
 225 among earthquakes which align  
 226 with current understandings of  
 227 the San Andreas Fault System [29].  
 228 However, both DNSK and ETAS fail  
 229 to extract this geographical feature  
 230 from the data.

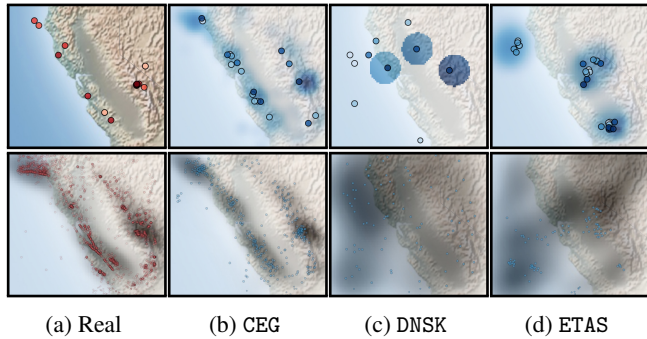

(a) Real (b) CEG (c) DNSK (d) ETAS  
 Figure 4: Comparison between real and generated earthquake sequence. The first row displays a single sequence, either real or generated, with the color depth of the dots reflecting the occurrence time of each event. Darker colors represent more recent events. The shaded areas represent the estimated conditional PDFs. The second row shows 1,000 real or generated events, where the gray area indicates the high density of events, which can be interpreted as the “background rate”.

221 **Atlanta crime reports with textual description** We further assess our method using 911-calls-  
 222 for-service data in Atlanta. The proprietary data set contains 4644 burglary incidents from 2016 to  
 223 2017, detailing the time, location, and a comprehensive textual description of each incident. Each  
 224 textual description was transformed into a TF-IDF vector [1], from which the top 10 keywords with  
 225 the most significant TF-IDF values were selected. The location combined with the corresponding  
 226 10-dimensional TF-IDF vector is regarded as the mark of the incident. We first fit our CEG model  
 227 using the preprocessed data, subsequently generate crime event sequences, and then compare them  
 228 with the real data.

229 Figure 5 visualizes the spatial distributions of the true and the generated TF-IDF value of each  
 230 keyword, respectively, signifying the heterogeneous crime patterns across the city. As we can observe,  
 231 our model is capable of capturing such spatial heterogeneity for different keywords and simulating  
 232 crime incidents that follow the underlying spatio-temporal-textual dynamics existing in criminological  
 233 *modus operandi* [34].

234 **References**

- 235 [1] Akiko Aizawa. An information-theoretic perspective of tf-idf measures. *Information Processing*  
236 *& Management*, 39(1):45–65, 2003.
- 237 [2] Homanga Bharadhwaj, Homin Park, and Brian Y Lim. Recgan: recurrent generative adversarial  
238 networks for recommendation systems. In *Proceedings of the 12th ACM Conference on*  
239 *Recommender Systems*, pages 372–376, 2018.
- 240 [3] Sam Bond-Taylor, Adam Leach, Yang Long, and Chris G Willcocks. Deep generative modelling:  
241 A comparative review of vaes, gans, normalizing flows, energy-based and autoregressive models.  
242 *IEEE transactions on pattern analysis and machine intelligence*, 2021.
- 243 [4] Xiuyuan Cheng and Hau-Tieng Wu. Convergence of graph laplacian with knn self-tuned kernels.  
244 *Information and Inference: A Journal of the IMA*, 11(3):889–957, 2022.
- 245 [5] Zheng Dong, Xiuyuan Cheng, and Yao Xie. Spatio-temporal point processes with deep non-  
246 stationary kernels. *arXiv preprint arXiv:2211.11179*, 2022.
- 247 [6] Nan Du, Hanjun Dai, Rakshit Trivedi, Utkarsh Upadhyay, Manuel Gomez-Rodriguez, and  
248 Le Song. Recurrent marked temporal point processes: Embedding event history to vector. In  
249 *Proceedings of the 22nd ACM SIGKDD international conference on knowledge discovery and*  
250 *data mining*, pages 1555–1564, 2016.
- 251 [7] Alex Graves and Alex Graves. Long short-term memory. *Supervised sequence labelling with*  
252 *recurrent neural networks*, pages 37–45, 2012.
- 253 [8] Jonathan Ho, Ajay Jain, and Pieter Abbeel. Denoising diffusion probabilistic models. *Advances*  
254 *in Neural Information Processing Systems*, 33:6840–6851, 2020.
- 255 [9] Ren-Hung Hwang, Yu-Ling Hsueh, and Yu-Ting Chen. An effective taxi recommender system  
256 based on a spatio-temporal factor analysis model. *Information Sciences*, 314:28–40, 2015.
- 257 [10] M Chris Jones. Simple boundary correction for kernel density estimation. *Statistics and*  
258 *computing*, 3:135–146, 1993.
- 259 [11] Diederik Kingma, Tim Salimans, Ben Poole, and Jonathan Ho. Variational diffusion models.  
260 *Advances in neural information processing systems*, 34:21696–21707, 2021.
- 261 [12] Diederik P Kingma and Jimmy Ba. Adam: A method for stochastic optimization. *arXiv preprint*  
262 *arXiv:1412.6980*, 2014.
- 263 [13] Diederik P. Kingma and Max Welling. Auto-Encoding Variational Bayes. In *2nd International*  
264 *Conference on Learning Representations, ICLR 2014, Banff, AB, Canada, April 14-16, 2014,*  
265 *Conference Track Proceedings*, 2014.
- 266 [14] Diederik P Kingma, Max Welling, et al. An introduction to variational autoencoders. *Founda-*  
267 *tions and Trends® in Machine Learning*, 12(4):307–392, 2019.
- 268 [15] Durk P Kingma, Shakir Mohamed, Danilo Jimenez Rezende, and Max Welling. Semi-supervised  
269 learning with deep generative models. *Advances in neural information processing systems*, 27,  
270 2014.
- 271 [16] Yifei Ma, Balakrishnan Narayanaswamy, Haibin Lin, and Hao Ding. Temporal-contextual rec-  
272 ommendation in real-time. In *Proceedings of the 26th ACM SIGKDD international conference*  
273 *on knowledge discovery & data mining*, pages 2291–2299, 2020.
- 274 [17] Raghvendra Mall, Rocco Langone, and Johan AK Suykens. Self-tuned kernel spectral clustering  
275 for large scale networks. In *2013 IEEE International Conference on Big Data*, pages 385–393.  
276 IEEE, 2013.
- 277 [18] Hongyuan Mei and Jason M Eisner. The neural hawkes process: A neurally self-modulating  
278 multivariate point process. *Advances in neural information processing systems*, 30, 2017.

- 279 [19] Northern California Earthquake Data Center. UC Berkeley Seismological Laboratory. Dataset.  
280 NCEDC, 2014.
- 281 [20] Yosihiko Ogata. On lewis' simulation method for point processes. *IEEE transactions on*  
282 *information theory*, 27(1):23–31, 1981.
- 283 [21] Yosihiko Ogata. Space-time point-process models for earthquake occurrences. *Annals of the*  
284 *Institute of Statistical Mathematics*, 50:379–402, 1998.
- 285 [22] Takahiro Omi, naonori ueda, and Kazuyuki Aihara. Fully neural network based model for  
286 general temporal point processes. In H. Wallach, H. Larochelle, A. Beygelzimer, F. d'Alché-Buc,  
287 E. Fox, and R. Garnett, editors, *Advances in Neural Information Processing Systems*, volume 32.  
288 Curran Associates, Inc., 2019.
- 289 [23] Alex Reinhart. A review of self-exciting spatio-temporal point processes and their applications.  
290 *Statistical Science*, 33(3):299–318, 2018.
- 291 [24] Oleksandr Shchur, Marin Biloš, and Stephan Günnemann. Intensity-free learning of temporal  
292 point processes. In *International Conference on Learning Representations*, 2020.
- 293 [25] Oleksandr Shchur, Ali Caner Türkmen, Tim Januschowski, and Stephan Günnemann. Neural  
294 temporal point processes: A review. *arXiv preprint arXiv:2104.03528*, 2021.
- 295 [26] Jascha Sohl-Dickstein, Eric Weiss, Niru Maheswaranathan, and Surya Ganguli. Deep unsu-  
296 pervised learning using nonequilibrium thermodynamics. In Francis Bach and David Blei,  
297 editors, *Proceedings of the 32nd International Conference on Machine Learning*, volume 37 of  
298 *Proceedings of Machine Learning Research*, pages 2256–2265, Lille, France, 07–09 Jul 2015.  
299 PMLR.
- 300 [27] Kihyuk Sohn, Honglak Lee, and Xinchen Yan. Learning structured output representation using  
301 deep conditional generative models. *Advances in neural information processing systems*, 28,  
302 2015.
- 303 [28] Ashish Vaswani, Noam Shazeer, Niki Parmar, Jakob Uszkoreit, Llion Jones, Aidan N Gomez,  
304 Łukasz Kaiser, and Illia Polosukhin. Attention is all you need. *Advances in neural information*  
305 *processing systems*, 30, 2017.
- 306 [29] Robert Earl Wallace. The san andreas fault system, california: An overview of the history,  
307 geology, geomorphology, geophysics, and seismology of the most well known plate-tectonic  
308 boundary in the world. 1990.
- 309 [30] Alex Williams, Anthony Degleris, Yixin Wang, and Scott Linderman. Point process models for  
310 sequence detection in high-dimensional neural spike trains. *Advances in neural information*  
311 *processing systems*, 33:14350–14361, 2020.
- 312 [31] David Wilmot and Frank Keller. A temporal variational model for story generation. *arXiv*  
313 *preprint arXiv:2109.06807*, 2021.
- 314 [32] Yong Yu, Xiaosheng Si, Changhua Hu, and Jianxun Zhang. A review of recurrent neural  
315 networks: Lstm cells and network architectures. *Neural computation*, 31(7):1235–1270, 2019.
- 316 [33] Shixiang Zhu, Haoyun Wang, Xiuyuan Cheng, and Yao Xie. Neural spectral marked point  
317 processes. In *International Conference on Learning Representations*, 2022.
- 318 [34] Shixiang Zhu and Yao Xie. Spatiotemporal-textual point processes for crime linkage detection.  
319 *The Annals of Applied Statistics*, 16(2):1151–1170, 2022.

320 **A Model estimation**

321 To learn the model, one can maximize the log-likelihood of the observed event series. The log-  
 322 likelihood of observing a sequence with  $N_T$  events can therefore be obtained by

$$\ell(x_1, \dots, x_{N_T}) = \int_{\mathcal{X}} \log \lambda(x | \mathcal{H}_{t(x)}) d\mathbb{N}(x) - \int_{\mathcal{X}} \lambda(x | \mathcal{H}_{t(x)}) dx. \quad (\text{A1})$$

323 An equivalent form of this objective can be expressed using conditional PDF, as shown in the  
 324 following equation (see Appendix B for the derivation):

$$\max_{\theta \in \Theta} \ell(\theta) := \frac{1}{K} \sum_{k=1}^K \int_{\mathcal{X}} \log f_{\theta}(x | \mathcal{H}_{t(x)}) d\mathbb{N}_k(x), \quad (\text{A2})$$

325 where  $K$  represents the total number of observed event sequences and  $\mathbb{N}_k$  is the counting measure  
 326 of the  $k$ -th event sequence. It is worth noting that this learning objective circumvents the need to  
 327 compute the integral in the second term of (A1), which can be computationally intractable when  
 328 events exist in a multi-dimensional data space.

329 Now the key challenge is *how do we obtain the conditional PDF of an event  $x$  without access to the*  
 330 *function  $f_{\theta}$ ?* This is a commonly posed inquiry in the realm of generative model learning, and there  
 331 are several pre-existing learning algorithms intended for generative models that can provide solutions  
 332 to this question [3]. In the rest of this section, we present two learning strategies that approximate the  
 333 conditional PDF using generated samples and demonstrate the effectiveness of the proposed approach  
 334 using numerical examples.

335 **Non-parametric density estimation** We present a non-parametric learning strategy that approxi-  
 336 mates the conditional PDF using kernel density estimation (KDE). Specifically, the conditional PDF  
 337 of the  $i$ -th event  $x_i$  can be estimated by,

$$f_{\theta}(x_i | \mathcal{H}_{t_i}) \approx \frac{1}{L} \sum_{l=1}^L \kappa_{\sigma}(x_i - \tilde{x}_i^{(l)}), \quad (\text{A3})$$

338 where  $\{\tilde{x}_i^{(l)}\}_{l=1}^L$  is a set of samples generated by model  $g(\cdot, \mathbf{h}_{i-1})$  and  $\kappa_{\sigma}$  is a kernel function with a  
 339 bandwidth  $\sigma$ . See our implementation details in Appendix C.

340 We note that it is important to consider boundary correction [10] for the kernel function in the time  
 341 dimension, as the support of the next event’s time is  $[0, +\infty)$ , and a regular KDE would extend it to  
 342 negative infinity. To select the kernel bandwidth  $\sigma$ , we adopt a common approach called the *self-tuned*  
 343 *kernel* [4, 17]. This method dynamically determines a value of  $\sigma$  for each sample  $\tilde{x}^{(j)}$  by computing  
 344 the  $k$ -nearest neighbor ( $k$ NN) distance among other generated samples. The use of self-tuned kernels  
 345 is crucial for the success of the model because the event distribution may change significantly over  
 346 the training iterations. Therefore, adapting the bandwidth for each iteration and sample is necessary  
 347 to achieve an accurate estimate of the conditional PDF.

348 **Variational approximation** Variational method is another widely-adopted approach for learning  
 349 a wide spectrum of generative models. Examples of such models include variational autoencoders  
 350 [13, 14] and diffusion models [8, 11, 26]. In this paper, we follow the idea of conditional variational  
 351 autoencoder (CVAE) [27] and approximate the log conditional PDF using its evidence lower bound  
 352 (ELBO):

$$\log f_{\theta}(x_i | \mathcal{H}_{t_i}) \geq -D_{\text{KL}}(q(z | x_i, \mathbf{h}_{i-1}) || p_{\theta}(z | \mathbf{h}_{i-1})) + \mathbb{E}_{q(z | x_i, \mathbf{h}_{i-1})} [\log p_{\theta}(x_i | z, \mathbf{h}_{i-1})], \quad (\text{A4})$$

353 where  $q$  is a variational approximation of the posterior distribution over the random noise given ob-  
 354 served  $i$ -th event  $x_i$  and its history  $\mathbf{h}_{i-1}$ . The first term on the right-hand side is the Kullback–Leibler  
 355 (KL) divergence of the approximate posterior  $q(\cdot | x_i, \mathbf{h}_{i-1})$  from the exact posterior  $p_{\theta}(\cdot | \mathbf{h}_{i-1})$ . The  
 356 second term is the log-likelihood of the latent data generating process. The complete derivation of  
 357 (A4) and implementation details can be found in the Appendix D.

358 **B Derivation of the conditional probability of point processes**

359 The conditional probability of point processes can be derived from the conditional intensity (1).  
 360 Suppose we are interested in the conditional probability of events at a given point  $x \in \mathcal{X}$ , and we

361 assume that there are  $i$  events that happen before  $t(x)$ . Let  $\Omega(x)$  be a small neighborhood containing  
 362  $x$ . According to (1), we can rewrite  $\lambda(x|\mathcal{H}_{t(x)})$  as following:

$$\begin{aligned}\lambda(x|\mathcal{H}_{t(x)}) &= \mathbb{E}(d\mathbb{N}(x)|\mathcal{H}_{t(x)})/dx = \mathbb{P}\{x_{i+1} \in \Omega(x)|\mathcal{H}_{t(x)}\}/dx \\ &= \mathbb{P}\{x_{i+1} \in \Omega(x)|\mathcal{H}_{t_{i+1}} \cup \{t_{i+1} \geq t(x)\}\}/dx \\ &= \frac{\mathbb{P}\{x_{i+1} \in \Omega(x), t_{i+1} \geq t(x)|\mathcal{H}_{t_{i+1}}\}/dx}{\mathbb{P}\{t_{i+1} \geq t(x)|\mathcal{H}_{t_{i+1}}\}}.\end{aligned}$$

363 Here  $\mathcal{H}_{t_{i+1}} = \{x_1, \dots, x_i\}$  represents the history up to  $i$ -th events. If we let  $F(t(x)|\mathcal{H}_{t(x)}) =$   
 364  $\mathbb{P}(t_{i+1} < t(x)|\mathcal{H}_{t_{i+1}})$  be the conditional cumulative probability, and  $f(x|\mathcal{H}_{t(x)}) \triangleq f(x_{i+1} \in$   
 365  $\Omega(x)|\mathcal{H}_{t_{i+1}})$  be the conditional probability density of the next event happening in  $\Omega(x)$ . Then the  
 366 conditional intensity can be equivalently expressed as

$$\lambda(x|\mathcal{H}_{t(x)}) = \frac{f(x|\mathcal{H}_{t(x)})}{1 - F(t(x)|\mathcal{H}_{t(x)})}.$$

367 We multiply the differential  $dx = dt dm$  on both sides of the equation and integral over the mark  
 368 space  $\mathcal{M}$ :

$$\begin{aligned}dt \cdot \int_{\mathcal{M}} \lambda(x|\mathcal{H}_{t(x)}) dm &= \frac{dt \cdot \int_{\mathcal{M}} f(x|\mathcal{H}_{t(x)}) dm}{1 - F(t(x)|\mathcal{H}_{t(x)})} = \frac{dF(t(x)|\mathcal{H}_{t(x)})}{1 - F(t(x)|\mathcal{H}_{t(x)})} \\ &= -d \log(1 - F(t(x)|\mathcal{H}_{t(x)})).\end{aligned}$$

369 Hence, integrating over  $t$  on  $[t_i, t(x)]$  leads to the fact that

$$\begin{aligned}F(t(x)|\mathcal{H}_{t(x)}) &= 1 - \exp\left(-\int_{t_i}^{t(x)} \int_{\mathcal{M}} \lambda(x|\mathcal{H}_{t(x)}) dm dt\right) \\ &= 1 - \exp\left(-\int_{[t_i, t(x)] \times \mathcal{M}} \lambda(x|\mathcal{H}_{t(x)}) dx\right)\end{aligned}$$

370 because  $F(t_i) = 0$ . Then we have

$$f(x|\mathcal{H}_{t(x)}) = \lambda(x|\mathcal{H}_{t(x)}) \cdot \exp\left(-\int_{[t_i, t(x)] \times \mathcal{M}} \lambda(x|\mathcal{H}_{t(x)}) dx\right),$$

371 which corresponds to (2).

372 The log-likelihood of one observed event series in (A1) is derived, by the chain rule, as

$$\begin{aligned}\ell(x_1, \dots, x_{N_T}) &= \log f(x_1, \dots, x_{N_T}) = \log \prod_{i=1}^{N_T} f(x_i|\mathcal{H}_{t_i}) \\ &= \int_{\mathcal{X}} \log f(x|\mathcal{H}_{t(x)}) d\mathbb{N}(x) \\ &= \int_{\mathcal{X}} \log \lambda(x|\mathcal{H}_{t(x)}) d\mathbb{N}(x) - \int_{\mathcal{X}} \lambda(x|\mathcal{H}_{t(x)}) dx.\end{aligned}$$

373 The log-likelihood of  $K$  observed event sequences in (A2) can be conveniently obtained with the  
 374 counting measure  $\mathbb{N}$  replaced by the counting measure  $\mathbb{N}_k$  for the  $k$ -th sequence.

## 375 C Implementation details of non-parametric learning

376 Estimating the conditional PDF  $f(x|\mathcal{H}_{t(x)})$  using kernel density estimation (KDE) within our frame-  
 377 work presents two main challenges: (1) The distribution density of events generated by certain  
 378 inhomogeneous point processes can vary from location to location in the event space. Consequently,  
 379 using a single bandwidth for estimation would either oversmooth the conditional PDF or introduce  
 380 excessive noise in areas with sparse events. (2) The time intervals of the next events are usually  
 381 clustered in a small neighborhood of 0 and always positive, which will lead to a significant boundary  
 382 bias.

383 To overcome the above challenges, we adopt the self-tuned kernel with boundary correction:

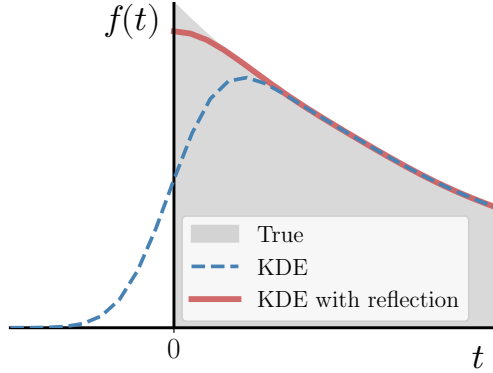

Figure B1: A comparison between the vanilla KDE and the KDE with boundary correction. The grey shaded area indicates the true density function, which is defined on the bounded region  $[0, +\infty)$ . The blue dashed line and red line show the estimated density function by the vanilla KDE and the KDE with reflection, respectively.

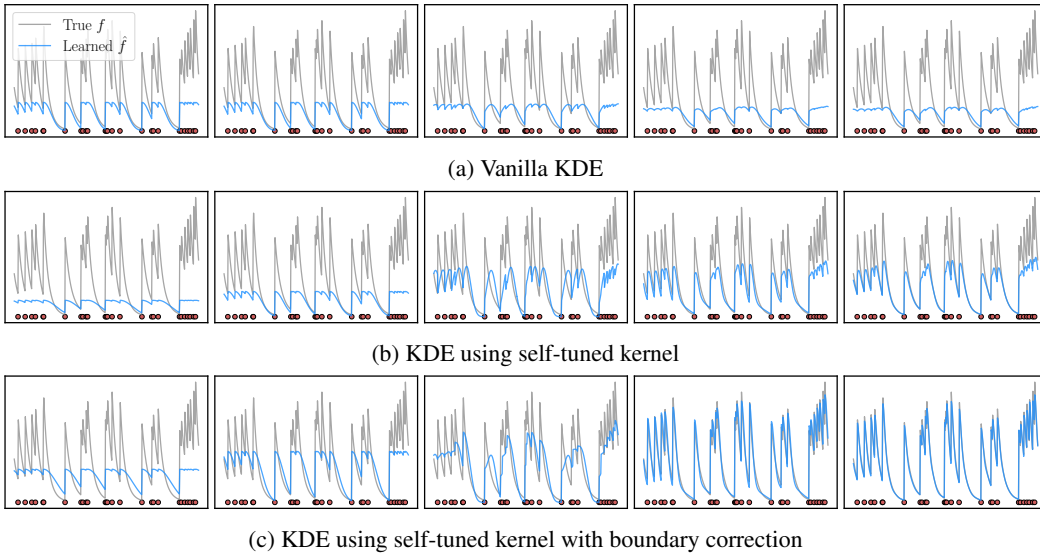

Figure B2: The estimated conditional PDF  $f(t|\mathcal{H}_t)$  of a testing sequence is displayed from left to right. Each panel within the same row represents the estimated conditional PDF at intervals of 10 training epochs.

- 384 1. We first choose the bandwidth adaptively, where the bandwidth  $\sigma$  tends to be small for those  
 385 samples falling into event clusters and to be large for those isolated samples. We dynamically  
 386 determine the value of  $\sigma$  for each sample  $\tilde{x}$  by computing the  $k$ -nearest neighbor ( $k$ NN) distance  
 387 among other generated samples [4, 17].
- 388 2. We correct the boundary bias of KDE by reflecting the data points against the boundary 0 in time  
 389 domain [10]. Specifically, the kernel with reflection is defined as follows:

$$\kappa(x - \tilde{x}) = v^*(\Delta t - \Delta \tilde{t}) \cdot v(m - \tilde{m}),$$

390 where  $v$  is an arbitrary kernel and  $v^*(x - \tilde{x}) = v(x - \tilde{x}) + v(-x - \tilde{x})$  is the same kernel with  
 391 reflection boundary. This allows for a more accurate estimation of the density near the boundary  
 392 of the time domain without impacting the estimation elsewhere, as shown in Figure B1.

393 Figure B2 compares the learned conditional PDF using three KDE methods on the same synthetic  
 394 data set generated by a self-exciting Hawkes process. The results show that the estimation using  
 395 the self-tuned kernel with boundary correction shown in (c) significantly outperforms two ablation  
 396 models in (a) and (b). We also summarize the learning algorithm in Algorithm 2.



---

**Algorithm 2** Non-parametric learning for CEG

---

**Input:** Training set  $X$  with  $K$  sequences:  $X = \{x_i^{(k)}\}_{i=1, \dots, \mathbb{N}_k(\mathcal{X}), k=1, \dots, K}$ , learning epoch  $E$ , learning rate  $\gamma$ , mini-batch size  $M$ .

**Initialization:** model parameters  $\theta$ ,  $e = 0$

**while**  $e < E$  **do**

**for** each sampled batch  $\widehat{X}^M$  with size  $M$  **do**

    1. Draw samples  $z$  from noise distribution  $\mathcal{N}(0, 1)$ ;

    2. Feed  $z$  into the generator  $g$  to obtain sampled events  $\tilde{x}$ ;

    3. Estimate conditional PDF using KDE (A3) and log-likelihood  $\ell$  (A1), given data  $\widehat{X}^M$ , samples  $\tilde{x}$  and the model;

    4.  $\theta \leftarrow \theta + \gamma \partial \ell / \partial \theta$ ;

**end for**

$e \leftarrow e + 1$ ;

**end while**

**return**  $\theta$

---

## 397 D Derivation and implementation details of variational learning

398 **Derivation of the approximate conditional PDF** Now we present the derivation of the approximate  
399 conditional PDF in (A4). We first use hidden embedding  $\mathbf{h}$  to represent the history  $\mathcal{H}_t(x)$  and  
400  $f_\theta(x|\mathcal{H}_t(x))$  can be substituted by  $f_\theta(x|\mathbf{h})$ . Then the conditional PDF of event  $x$  given the history  
401 can be re-written as:

$$\log f_\theta(x|\mathbf{h}) = \log \int p_\theta(x, z|\mathbf{h}) dz,$$

402 where  $z$  is a latent random variable. This integral has no closed form and can usually be estimated by  
403 Monte Carlo integration with importance sampling, *i.e.*,

$$\int p_\theta(x, z|\mathbf{h}) dz = \mathbb{E}_{z \sim q(\cdot|x, \mathbf{h})} \left[ \frac{p_\theta(x, z|\mathbf{h})}{q(z|x, \mathbf{h})} \right].$$

404 Here  $q(z|x, \mathbf{h})$  is the proposed variational distribution, where we can draw sample  $z$  from this  
405 distribution given  $x$  and  $\mathbf{h}$ . Therefore, by Jensen's inequality, we can find the evidence lower bound  
406 (ELBO) of the conditional PDF:

$$\log f_\theta(x|\mathbf{h}) = \log \mathbb{E}_{z \sim q(\cdot|x, \mathbf{h})} \left[ \frac{p_\theta(x, z|\mathbf{h})}{q(z|x, \mathbf{h})} \right] \geq \mathbb{E}_{z \sim q(\cdot|x, \mathbf{h})} \left[ \log \frac{p_\theta(x, z|\mathbf{h})}{q(z|x, \mathbf{h})} \right].$$

407 Using Bayes rule, the ELBO can be equivalently expressed as:

$$\begin{aligned} \mathbb{E}_{z \sim q(\cdot|x, \mathbf{h})} \left[ \log \frac{p_\theta(x, z|\mathbf{h})}{q(z|x, \mathbf{h})} \right] &= \mathbb{E}_{z \sim q(\cdot|x, \mathbf{h})} \left[ \log \frac{p_\theta(x|z, \mathbf{h}) p_\theta(z|\mathbf{h})}{q(z|x, \mathbf{h})} \right] \\ &= \mathbb{E}_{z \sim q(\cdot|x, \mathbf{h})} \left[ \log \frac{p_\theta(z|\mathbf{h})}{q(z|x, \mathbf{h})} \right] + \mathbb{E}_{z \sim q(\cdot|x, \mathbf{h})} [\log p_\theta(x|z, \mathbf{h})] \\ &= -D_{\text{KL}}(q(z|x, \mathbf{h})||p_\theta(z|\mathbf{h})) + \mathbb{E}_{z \sim q(\cdot|x, \mathbf{h})} [\log p_\theta(x|z, \mathbf{h})]. \end{aligned}$$

408 **Implementation details** In practice, we introduce two additional generator functions, *encoder*  
409 *net*  $g_{\text{encode}}(\epsilon, x_i, \mathbf{h}_{i-1})$  and *prior net*  $g_{\text{prior}}(\epsilon, \mathbf{h}_{i-1})$ , respectively, to represent  $q(z|x_i, \mathbf{h}_{i-1})$  and  
410  $p_\theta(z|\mathbf{h}_{i-1})$  as transformations of another random variable  $\epsilon \sim \mathcal{N}(0, I)$  using reparametrization trick  
411 [26]. Both  $q(z|x_i, \mathbf{h}_{i-1})$  and  $p_\theta(z|\mathbf{h}_{i-1})$  are often modeled as Gaussian distributions, which allows  
412 us to compute the KL divergence of Gaussians with a closed-form expression. The log-likelihood  
413 of the second term can be implemented as the reconstruction loss and calculated using generated  
414 samples.

415 We parameterize both  $p_\theta(z|\mathbf{h})$  and  $q(z|x, \mathbf{h})$  using fully-connected neural networks with one hidden  
416 layer, denoted by  $g_{\text{prior}}$  and  $g_{\text{encode}}$ , respectively. The prior of the latent variable is modulated by the  
417 input  $\mathbf{h}$  in our formulation; however, the constraint can be easily relaxed to make the latent variables  
418 statistically independent of input variables, *i.e.*,  $p_\theta(z|\mathbf{h}) = p_\theta(z)$  [15, 27]. For the approximate poster-  
419 ior  $q(z|x, \mathbf{h})$ , a common choice is a simple factorized Gaussian encoder, which can be represented  
420 as:

$$q(z|x, \mathbf{h}) = \mathcal{N}(z; \mu, \text{diag}(\Sigma)),$$



---

**Algorithm 3** Variational learning for CEG using stochastic gradient descent

---

**Input:** Training set  $X$  with  $K$  sequences:  $X = \{x_i^{(k)}\}_{i=1, \dots, \mathbb{N}_k(\mathcal{X}), k=1, \dots, K}$ , learning epoch  $E$ , learning rate  $\gamma$ , mini-batch size  $M$ .  
**Initialization:** model parameters  $\theta$ ,  $e = 0$   
**while**  $e < E$  **do**  
  **for** each sampled batch  $\widehat{X}^M$  with size  $M$  **do**  
    1. Draw samples  $\epsilon$  from noise distribution  $\mathcal{N}(0, 1)$ ;  
    2. Compute  $z$  using reparametrization trick, given data  $\widehat{X}^M$ , noise  $\epsilon$ ,  $g_{\text{prior}}$ , and  $g_{\text{encode}}$ ;  
    3. Compute ELBO (A4) and log-likelihood  $\ell$  (A1) based on  $z$  and data  $\widehat{X}^M$ ;  
    4.  $\theta \leftarrow \theta + \gamma \partial \ell / \partial \theta$ ;  
  **end for**  
   $e \leftarrow e + 1$ ;  
**end while**  
**return**  $\theta$

---

421 or

$$q(z|x, \mathbf{h}) = \prod_{j=1}^r q(z_j|x, \mathbf{h}) = \prod_{j=1}^r \mathcal{N}(z_j; \mu_j, \sigma_j^2).$$

422 The Gaussian parameters  $\mu = (\mu_j)_{j=1, \dots, r}$  and  $\text{diag}(\Sigma) = (\sigma_j^2)_{j=1, \dots, r}$  are the output of an encoder  
423 network  $\phi$  and the latent variable  $z$  can be obtained using reparametrization trick:

$$\begin{aligned} (\mu, \log \text{diag}(\Sigma)) &= \phi(x, \mathbf{h}), \\ z &= \mu + \text{diag}(\Sigma) \odot \epsilon, \end{aligned}$$

424 where  $\epsilon \sim \mathcal{N}(0, I)$  is another random variable and  $\odot$  is the element-wise product. For simplicity in  
425 presentation, we denote such a factorized Gaussian encoder as  $g_{\text{encode}}(\epsilon, x, \mathbf{h})$  that maps an event  $x$ ,  
426 its history  $\mathbf{h}$ , and a random noise vector  $\epsilon$  to a sample  $z$  from the approximate posterior for that event  
427  $x$ .428 In (A4), the first term is the KL divergence of the approximate posterior from the prior, which acts as a  
429 regularizer, while the second term is an expected negative reconstruction error. They can be calculated  
430 as follows: (1) Because both  $q(z|x_i, \mathbf{h}_{i-1})$  and  $p_\theta(z|\mathbf{h}_{i-1})$  are modeled as Gaussian distributions,  
431 the KL divergence can be computed using a closed-form expression. (2) Minimizing the negative  
432 log-likelihood  $p_\theta(x|z, \mathbf{h})$  is equivalent to maximizing the cross entropy between the distribution of  
433 an observed event  $x$  and the reconstructed event  $\tilde{x}$  generated by the generative model  $g$  given  $z$  and  
434 the history  $\mathbf{h}$ . The learning algorithm has been summarized in Algorithm 3.435 **E Sampling efficiency comparison**436 Thinning algorithms are known to be challenging and suffer from low sampling efficiency. This  
437 is because (i) these algorithms require sampling uniformly in the space  $\mathcal{X}$  with the upper limit of  
438 the conditional intensity  $\bar{\lambda} > \lambda(x)$ ,  $\forall x$ , and only a few candidate points are retained in the end.  
439 (ii) the decision of whether to reject one candidate point requires the evaluation of the conditional  
440 intensity function over the entire history, which is also stochastic. This doubly stochastic trait makes  
441 the entire thinning process particularly costly when  $\mathcal{X}$  is a multi-dimensional space, since it requires  
442 a drastically large number of candidate points and numerous evaluations of the conditional intensity  
443 function.444 On the contrary, our model generates samples based on the underlying conditional distribution of  
445 events learned from true data, thus every generated point will be retained. Table E1 compares the time  
446 costs for ETAS, DNSK, and CEG to generate event series of length 100 on each data set. Particularly  
447 noteworthy is that our model requires a similar amount of time to generate different numbers of  
448 sequences. This is because CEG can generate all the sequences in parallel, leveraging the benefits of  
449 the implementation of conditional generative models.

Table E1: Computation costs for generating earthquake series and time-stamped image series of length 100 using ETAS, DNSK and CEG.

| Model | 3D earthquake data |              | T-MNIST     |              | T-CIFAR     |              |
|-------|--------------------|--------------|-------------|--------------|-------------|--------------|
|       | 5 sequences        | 50 sequences | 5 sequences | 50 sequences | 5 sequences | 50 sequences |
| ETAS  | 12.4               | 118.6        | /           | /            | /           | /            |
| DNSK  | 20.1               | 220.4        | 87.3        | 745.6        | 274.0       | 1381.9       |
| CEG   | < 1                | < 1          | 0.6         | 0.8          | 1.1         | 1.2          |

\*Unit: second.

## 450 F Experiment details and additional results

451 **Baselines** We compare our proposed method empirically with the following baselines:

- 452 1. *Recurrent Marked Temporal Point Process* (RMTTP) [6] uses an RNN to capture the nonlinear  
453 relationship between both the markers and the timings of past events. It models the conditional  
454 intensity function by

$$\lambda(t|\mathcal{H}_t) = \exp(\mathbf{v}^\top \mathbf{h}_i + w(t - t_i) + b),$$

455 where hidden state  $\mathbf{h}_i$  of the RNN represents the event history until the nearest  $i$ -th event  $\mathcal{H}_{t_i} \cup$   
456  $\{t_i\}$ . The  $\mathbf{v}, w, b$  are trainable parameters. The model is learned by MLE using backpropagation  
457 through time (BPTT).

- 458 2. *Neural Hawkes Process* (NH) [18] extends the classical Hawkes process by memorizing the  
459 long-term effects of historical events. The conditional intensity function is given by

$$\lambda(t|\mathcal{H}_t) = f(\mathbf{w}^\top \mathbf{h}_t),$$

460 where  $\mathbf{h}_t$  is a sufficient statistic of the event history modeled by the hidden state in a continuous-  
461 time LSTM, and  $f(\cdot)$  is a scaled softplus function for ensuring positive output. The weight  $\mathbf{w}$  is  
462 learned jointly with the LSTM through MLE.

- 463 3. *Fully Neural Network based Model* (FullyNN) for General Temporal Point Processes [22]  
464 models the cumulative hazard function given the history embedding  $\mathbf{h}_i$ , which leads to a tractable  
465 likelihood. It uses a fully-connect neural network  $Z_i$  with a non-negative activation function for  
466 the cumulative hazard function  $\Phi(\tau|\mathbf{h}_i)$  where  $\tau = t - t_i$ . The conditional intensity function is  
467 obtained by computing the derivative of the network:

$$\lambda(t|\mathcal{H}_t) = \frac{\partial}{\partial(\tau)} \Phi(\tau|\mathbf{h}_i) = \frac{\partial}{\partial(\tau)} Z_i(\tau),$$

468 where  $Z_i$  is the fully-connect neural network.

- 469 4. *Epidemic-type aftershock sequence* (ETAS) acts as a benchmark in spatio-temporal point process  
470 modeling. Denoting each event  $x := (t, s)$ , ETAS adopts a Gaussian diffusion kernel in the  
471 conditional intensity as following

$$\lambda(t, s|\mathcal{H}_t) = \mu + \sum_{(t_i, s_i) \in \mathcal{H}_t} k(t, t_i, s, s_i),$$

472 where

$$k(t, t_i, s, s_i) = \frac{C e^{-\beta(t-t_i)}}{2\pi \sqrt{|\Sigma|} (t-t_i)} \cdot \exp \left\{ -\frac{(s-s_i-a)^\top \Sigma^{-1} (s-s_i-a)}{2(t-t_i)} \right\}.$$

473 Here  $\Sigma = \text{diag}(\sigma_x^2, \sigma_y^2)$  is a diagonal matrix representing the covariance of the spatial correlation.  
474 Note that the diffusion kernel is stationary and only depends on the spatio-temporal distance  
475 between two events. All the parameters are learnable.

- 476 5. *Deep non-stationary kernel* (DNSK) proposes a neural-network-based influence kernel based on  
477 kernel singular value decomposition for modeling spatio-temporal point process data. In addition,  
478 their kernel can be extended to handle high-dimensional marks:

$$k(t_i, t-t_i, s_i, s-s_i, m_i, m) = \sum_{q=1}^Q \sum_{r=1}^R \sum_{l=1}^L \alpha_{l r q} \psi_l(t_i) \varphi_l(t-t_i) u_r(s_i) v_r(s-s_i) g_q(m_i) h_q(m).$$

479 Here all the basis functions are represented by fully-connected neural networks.

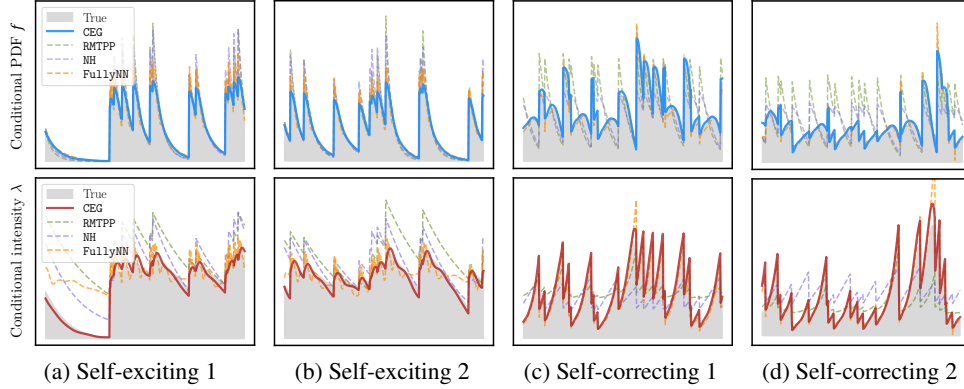

Figure F3: Out-of-sample estimation of the conditional PDF  $f(t|\mathcal{H}_t)$  and the corresponding intensity  $\lambda(t|\mathcal{H}_t)$  using the proposed method on one-dimensional (time only) synthetic event sequences.

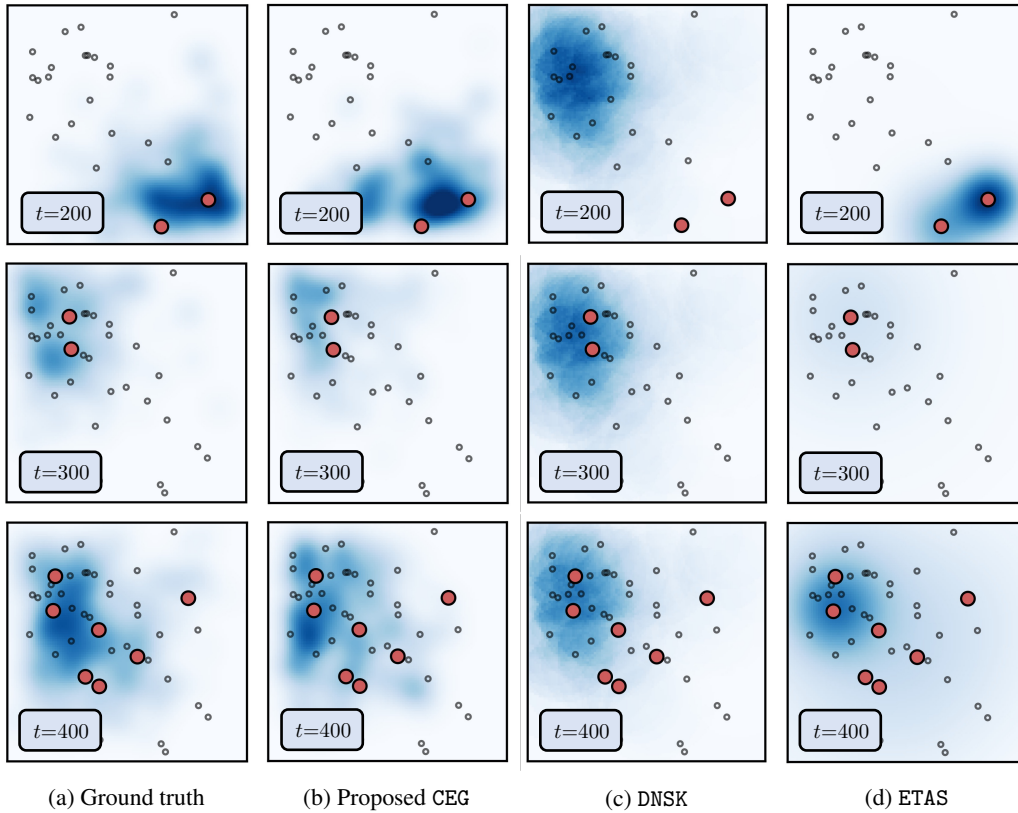

Figure F4: Snapshots of out-of-sample estimation of the conditional PDFs for a three-dimensional (time and space) synthetic event sequence, arranged in chronological order from left to right. The conditional PDFs are indicated by shaded areas, with darker shades indicating higher conditional PDF values. The red dots represent newly observed events within the most recent time period, while the circles represent historical events.

480 **Synthetic data description** We use the following point process models to generate the one-  
 481 dimensional synthetic data sets using Algorithm 4:

- 482 1. Self-exciting Hawkes process:  $\lambda(t) = \mu + \sum_{t_i \in \mathcal{H}_t} \beta e^{-\beta(t-t_i)}$ , with  $\mu = 0.1, \beta = 0.1$  and  
 483  $\mu = 0.5, \beta = 1.0$  in self-exciting data 1 and 2, respectively.  
 484 2. Self-correcting process:  $\lambda(t) = \exp(\mu t - \sum_{t_i \in \mathcal{H}_t} \alpha)$ , with  $\mu = 1.0, \alpha = 1.0$  and  $\mu = 0.5, \alpha =$   
 485  $0.8$  in self-correcting data 1 and 2, respectively.

---

**Algorithm 4** Thinning algorithm

---

**Input:** Model  $\lambda(\cdot)$ , time horizon  $T$ , mark space  $\mathcal{M}$ , Intensity upper bound  $\bar{\lambda}$ .

**Initialization:**  $\mathcal{H}_T = \emptyset, t = 0, i = 0$

**while**  $t < T$  **do**

1. Sample  $u \sim \text{Unif}(0, 1)$ .

2.  $t \leftarrow t - \ln u / \bar{\lambda}$ .

3. Sample  $m \sim \text{Unif}(\mathcal{M}), D \sim \text{Unif}(0, 1)$ .

4.  $\lambda = \lambda(t, m | \mathcal{H}_T)$ .

**if**  $D\bar{\lambda} \leq \lambda$  **then**

$i \leftarrow i + 1; t_i = t, m_i = m.$

$\mathcal{H}_T \leftarrow \mathcal{H}_T \cup \{(t_i, m_i)\}.$

**end if**

**end while**

**if**  $t_i \geq T$  **then**

**return**  $\mathcal{H}_T - \{(t_i, m_i)\}$

**else**

**return**  $\mathcal{H}_T$

**end if**

---

- 486 3. T-MNIST: In the MNIST series, all the digits that are greater than nine will be truncated to nine.  
487 The exponentially decaying kernel for the observation times are  $k(t, t_i) = \beta e^{-\beta(t-t_i)}$ ,  $\beta = 0.2$ .  
488 4. T-CIFAR: The images of bicycles and motorcycles represent outdoor exercises; the apples, pears,  
489 and oranges represent food ingestion; the computer keyboards represent study/working; and  
490 the beds represent sleeping. Before 21:00, the activity series progresses with the transition  
491 probability matrix between (exercise, food ingestion, working) being

$$P = \begin{pmatrix} 0.0 & 1.0 & 0.0 \\ 0.2 & 0.0 & 0.8 \\ 0.2 & 0.3 & 0.5 \end{pmatrix}.$$

- 492 Starting from 21:00, the probability of sleeping increases linearly from 0 to 1 at 23:00. Each  
493 series ends with the activity of sleeping. The self-correcting process for event times is set with  
494  $\mu = 0.1$ ,  $\alpha = 0.5$ , indicating that each activity will last for a while before the student moves to  
495 the next activity (or stays in the current one).

496 **Experimental setup** We choose our generator  $g$  to be a fully-connected neural network with two  
497 hidden layers of width 32 with softplus activation function. To guarantee that the generated time  
498 interval is always positive, we apply an extra Rectified Linear Unit (ReLU) function for the output  
499 of the time dimension in the output layer. We use an LSTM for the history encoder  $\psi$ . We train our  
500 model and other baselines using 90% of the data and test them on the remaining 10% data. To fit the  
501 model parameters, we maximize log-likelihood according to (A2), and adopt Adam optimizer [12]  
502 with a learning rate of  $10^{-3}$  and a batch size of 32 (event sequences). More details about experimental  
503 setup can be found in Appendix F.

504 For RMTTPP, NH and FullyNN, we take the default parameters for model architectures in the original  
505 papers, with the dimension of hidden embedding to be 64 for all three models, and a fully-connected  
506 neural network with two hidden layers of width 64 for the cumulative hazard function in FullyNN.  
507 There is no hyperparameter in ETAS. All the baselines are trained using the Adam optimizer with a  
508 learning rate of  $10^{-3}$  and a batch size of 32 for 100 epochs. The experiments are implemented on  
509 Google Colaboratory (Pro version) with 12GB RAM and a Tesla T4 GPU.

## 510 F.1 Additional experiment results

511 **3D synthetic data** Each row in Figure F4 displays four snapshots of estimated conditional proba-  
512 bility density functions (PDFs) for a particular 3D testing sequence. It is apparent that our model’s  
513 estimated PDFs closely match the ground truth and accurately capture the complex spatial and  
514 temporal point patterns. Conversely, DNSK and ETAS model for estimating spatio-temporal point  
515 processes fails to capture the heterogeneous triggering effects between events, indicating limited  
516 practical representational power.

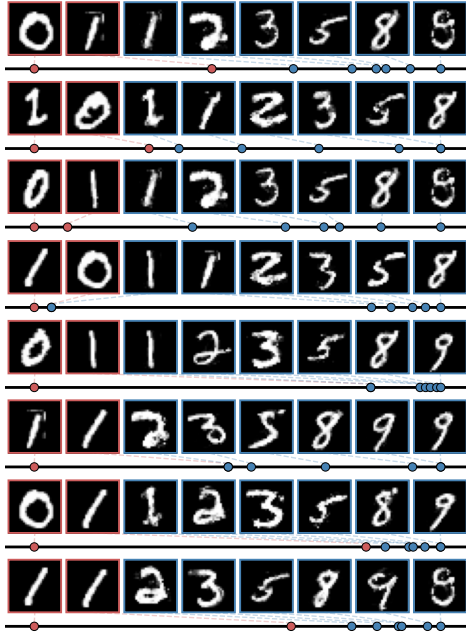

(a) Additional T-MNIST series generated by CEG

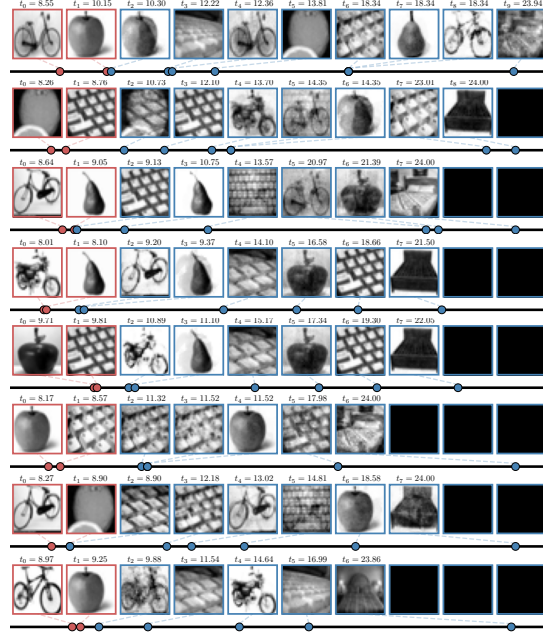

(b) Additional T-CIFAR series generated by CEG

Figure F5: Additional T-MNIST and T-CIFAR series using CEG and a neural point process baseline DNSK, with true sequences displayed on the left. Each event series is generated (blue boxes) given the first two true events (red boxes).

517 **Semi-synthetic image data** More generated T-MNIST and T-CIFAR series by CEG are presented in  
 518 Figure F5. As we can see, our generative point process can not only sample images that resemble the  
 519 ground truth, but also recover the intricate temporal dynamics (e.g., clustering effect of self-exciting  
 520 process in T-MNIST, student’s sleeping time in T-CIFAR) and high-dimensional mark dependencies.

521 **Northern California earthquake catalog** Additional results in Figure F6 visualizes the conditional  
 522 PDF estimated by CEG, DNSK, and ETAS for an actual earthquake sequence in testing set, respectively.  
 523 The results indicate that our model is able to capture the heterogeneous effects among earthquakes.  
 524 Particularly noteworthy is our model’s finding of a heightened probability of seismic activity along  
 525 the San Andreas fault, coupled with a diminished likelihood in the basin. These results align with  
 526 current understandings of the mechanics of earthquakes in Northern California. However, both DNSK  
 527 and ETAS fail to extract this geographical feature from the data and suggest that observed earthquakes  
 528 impact their surroundings uniformly, leading to an increased likelihood of aftershocks within a  
 529 circular area centered on the location of the initial event.

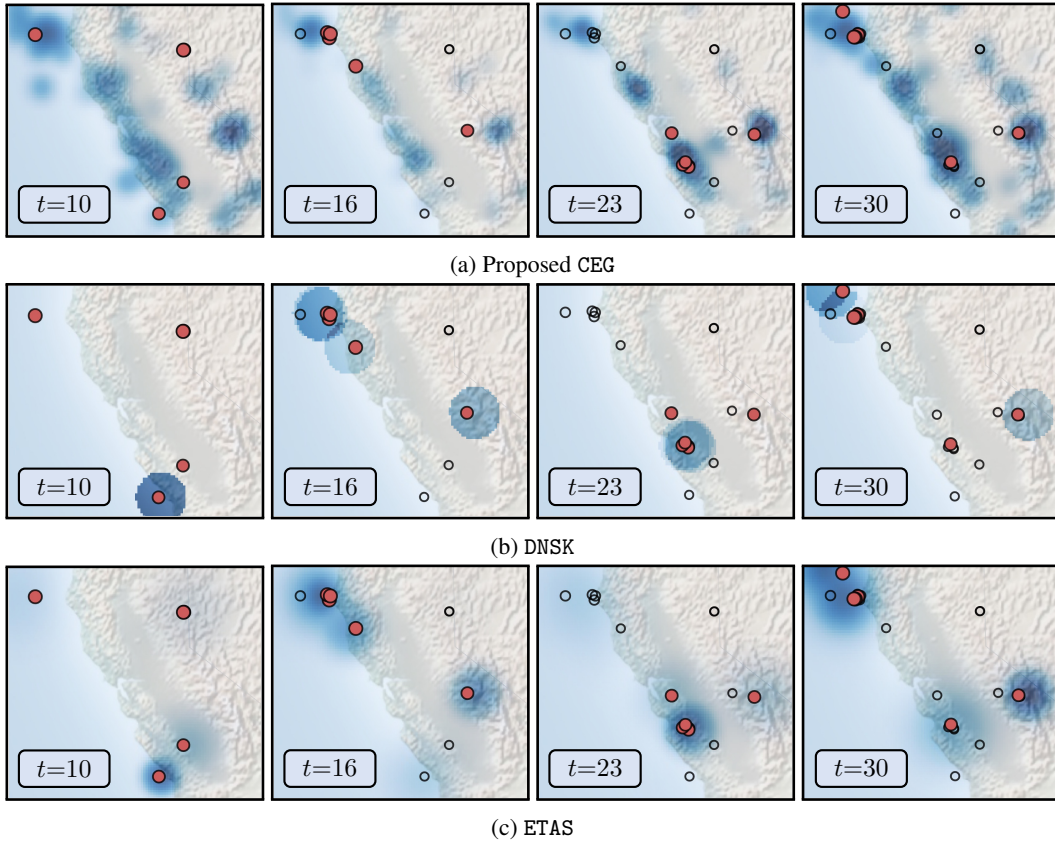

Figure F6: Estimated conditional PDFs of an actual earthquake sequence represented by shaded areas, with darker shades indicating higher conditional PDF values. Each row contains four sub-figures, arranged in chronological order from left to right, showing snapshots of the estimated conditional PDFs. The red dots represent newly observed events within the most recent time period, while the circles represent historical events.
